# Supplementary material
Source: PubMed Central journal article supplement (PMC1959441)
Supplement: pnas_0703650104_1.pdf [file pnas_0703650104_1.pdf]

|             |   |   |   |   |   |   |   |   |   |   |   |   |   |   |   |   |   |   |   |   |   |   |   |   |   |   |   |   |   |   |
|-------------|---|---|---|---|---|---|---|---|---|---|---|---|---|---|---|---|---|---|---|---|---|---|---|---|---|---|---|---|---|---|
| <i>h</i> /R | S | L | A | G | N | G | S | W | T | E | P | T | Y | F | Y | V | T | D | Y | L | D | V | P | S | N | I | A | K | I | I |
| <i>m</i> /R | S | L | A | G | N | G | S | W | T | E | P | T | Y | F | Y | V | T | D | Y | L | D | V | P | S | N | I | A | K | I | I |
| <i>r</i> /R | S | L | A | G | N | G | S | W | T | E | P | T | Y | F | Y | V | T | D | Y | L | D | V | P | S | N | I | A | K | I | I |

940 950 960

|             |   |   |   |   |   |   |   |   |   |   |   |   |   |   |   |   |   |   |   |   |   |   |   |   |   |   |   |   |   |   |
|-------------|---|---|---|---|---|---|---|---|---|---|---|---|---|---|---|---|---|---|---|---|---|---|---|---|---|---|---|---|---|---|
| <i>h</i> /R | I | G | P | L | I | F | V | F | L | F | S | V | V | I | G | S | I | Y | L | F | L | R | K | R | Q | P | D | G | P | L |
| <i>m</i> /R | I | G | P | L | I | F | V | F | L | F | S | V | V | I | G | S | I | Y | L | F | L | R | K | R | Q | P | D | G | P | M |
| <i>r</i> /R | I | G | P | L | I | F | V | F | L | F | S | V | V | I | G | S | I | Y | L | F | L | R | K | R | Q | P | D | G | P | M |

970 980 990

**transmembrane domain**

|             |   |   |   |   |   |   |   |   |   |   |   |   |   |   |   |   |   |   |   |   |   |   |   |   |   |   |   |   |   |   |
|-------------|---|---|---|---|---|---|---|---|---|---|---|---|---|---|---|---|---|---|---|---|---|---|---|---|---|---|---|---|---|---|
| <i>h</i> /R | G | P | L | Y | A | S | S | N | P | E | Y | L | S | A | S | D | V | F | P | C | S | V | Y | V | P | D | E | W | E | V |
| <i>m</i> /R | G | P | L | Y | A | S | S | N | P | E | Y | L | S | A | S | D | V | F | P | S | S | V | Y | V | P | D | E | W | E | V |
| <i>r</i> /R | G | P | L | Y | A | S | S | N | P | E | Y | L | S | A | S | D | V | F | P | S | S | V | Y | V | P | D | E | W | E | V |

1000 1010 1020
