# Supplementary material
Source: PubMed Central journal article supplement (PMC1959441)
Supplement: pnas_0703650104_3.pdf [file pnas_0703650104_3.pdf]

A

*hEGFR* P G L E G C C P T N - - G P P K I P S I A T G M V V G A L L L L L L L  
*mEGFR* P G L Q G C C E V W P P S G P P K I P S I A T G I V G G L L L F I V  
*hEGFR* P G L K G C C Q V Q P E - - G P P K I P S I A T G I V G G L L L F I V

transmembrane domain

*hEGFR* V V A L L G I G L F F M R R R R H I V R R K R T L R R L L Q E R E L  
*mEGFR* V V A L L G I G L F F M R R R R H I V R R K R T L R R L L Q E R E L  
*hEGFR* V V A L L G I G L F F M R R R R Q L V R R K R T L R R L L Q E R E L

B

*hPDGFR-beta* N A V G G Q D T Q E V V I V V P P H S L P F F K V V V I S A I L L A L  
*mPDGFR-beta* N S M G G G D S Q E V V T V V P P H S L P F F K V V V I S A I L L A L  
*hPDGFR-beta* N S M G G R D S Q E V V T V V P P H S L P F F K V V V I S A I L L A L

*hPDGFR-beta* V V L L T T I I S L I I L I M L W Q K K P R Y E I R W K K V I E S  
*mPDGFR-beta* V V L L T T V I S L I I L I M L W Q K K P R Y E I R W K K V I E S  
*hPDGFR-beta* V V L L T T V I S L I I L I M L W Q R K K P R Y E I R W K K V I E S

transmembrane domain
