# Supplementary material
Source: PubMed Central journal article supplement (PMC1959441)

IR<sup>WT</sup>-GFP

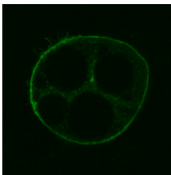

IR<sup>K944R</sup>-GFP

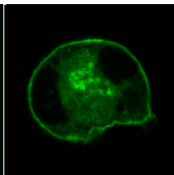

IR<sup>K944V</sup>-GFP

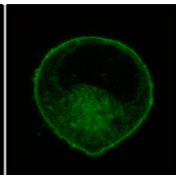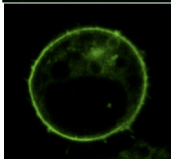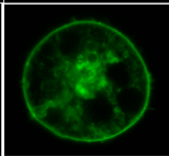

IR<sup>K944S</sup>-GFP

IR<sup>K944G</sup>-GFP

Supplement: pnas_0703650104_2.pdf [file pnas_0703650104_2.pdf]
